# Supplementary material for: Production of high yield short duration Brassica napus by interspecific hybridization between B. oleracea and B. rapa
Source: PubMed Central journal article supplement — Breed Sci. 2014 Mar 1;63(5):495–502. doi: 10.1270/jsbbs.63.495 (PMC3949587; doi:10.1270/jsbbs.63.495), 2014-03-01
Supplement: 63_495_s1.pdf [file 63_495_s1.pdf]

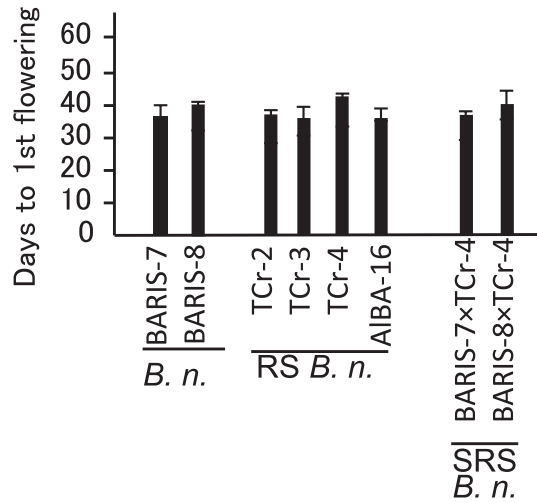

**Supplemental Fig. 1.** Days to 1st flowering in greenhouse trial of resynthesized (RS) F<sub>3</sub> and semi-resynthesized (SRS) F<sub>2</sub> lines and their parents grown from March to May in Japan. TCr (Tori-7 × CrGC3-1), CrT-14 (CrGC3-1 × Tori-7), AIBA (*B. alboblabra* × BARIS-14), BARIS (BARI sarisha). Data are indicated by the mean ± SE.
