# Supplementary material for: Production of high yield short duration Brassica napus by interspecific hybridization between B. oleracea and B. rapa
Source: PubMed Central journal article supplement — Breed Sci. 2014 Mar 1;63(5):495–502. doi: 10.1270/jsbbs.63.495 (PMC3949587; doi:10.1270/jsbbs.63.495), 2014-03-01
Supplement: 63_495_s2.pdf [file 63_495_s2.pdf]

**Supplemental Table 1.** Flowering time, maturity and yield per plant of RS F<sub>3</sub> and SRS F<sub>2</sub> *B. napus* along with their parents grown in the short-day climate of Bangladesh (Mean and  $\pm$ SE)

|                                          | <b>1<sup>st</sup> Flowering<br/>(DAS)</b> | <b>50% Flowering<br/>(DAS)</b> | <b>100% Flowering<br/>(DAS)</b> | <b>Yield/plant<br/>(g)</b> | <b>Days to<br/>Maturity</b> |
|------------------------------------------|-------------------------------------------|--------------------------------|---------------------------------|----------------------------|-----------------------------|
| <b>RS <i>B. napus</i> F<sub>3</sub></b>  |                                           |                                |                                 |                            |                             |
| TCr-2 <sup>a</sup>                       | 29.3 $\pm$ 0.3                            | 50.7 $\pm$ 3.4                 | 65.3 $\pm$ 1.9                  | 28.3 $\pm$ 4.0             | 120                         |
| TCr-3                                    | 42.7 $\pm$ 0.6                            | 50.0 $\pm$ 1.7                 | 58.3 $\pm$ 4.5                  | 31.4 $\pm$ 8.0             | 130                         |
| TCr-4                                    | 35.0 $\pm$ 0.6                            | 46.0 $\pm$ 1.7                 | 50.7 $\pm$ 4.6                  | 17.8 $\pm$ 6.6             | 112                         |
| CrT-14                                   | 47.5 $\pm$ 1.5                            | 60.0 <sup>c</sup>              | 80.0 <sup>c</sup>               | 24.5 $\pm$ 5.6             | 138                         |
| AlBA-16                                  | 41.3 $\pm$ 5.3                            | 47.3 $\pm$ 4.1                 | 58.7 $\pm$ 0.9                  | 41.4 $\pm$ 7.0             | 112                         |
| <b>SRS <i>B. napus</i> F<sub>2</sub></b> |                                           |                                |                                 |                            |                             |
| BARI Sharisha -7 $\times$ TCr-4          | 32.0 $\pm$ 0.0                            | 42.0 $\pm$ 1.6                 | 50.3 $\pm$ 4.4                  | 18.7 $\pm$ 2.5             | 104                         |
| BARI Sharisha-8 $\times$ TCr-4           | 36.3 $\pm$ 0.3                            | 45.3 $\pm$ 2.2                 | 59.0 $\pm$ 0.6                  | 33.4 $\pm$ 13.6            | 108                         |
| CrGc5-1 $\times$ TCr-3                   | 44.0 $\pm$ 0.0                            | 57.0 $\pm$ 1.0                 | 70.0 $\pm$ 1.6                  | 22.8 $\pm$ 9.7             | 116                         |
| CrGc5-1 $\times$ TCr-4                   | 40.3 $\pm$ 2.3                            | 50.0 $\pm$ 3.1                 | 64.7 $\pm$ 1.8                  | 23.8 $\pm$ 4.4             | 112                         |
| Kirariboshi $\times$ TCr-2               | 65.7 $\pm$ 0.9                            | 83.7 $\pm$ 0.9                 | 96.7 $\pm$ 0.3.                 | 18.2 $\pm$ 4.0             | 145                         |
| Kirariboshi $\times$ TCr-4               | 80.3 $\pm$ 2.3                            | 87.0 <sup>c</sup>              | 102 $\pm$ 0.0                   | 14.7 $\pm$ 1.5             | 140                         |
| <b>Parental species</b>                  |                                           |                                |                                 |                            |                             |
| Tori-7(AA)                               | 22.3 $\pm$ 0.3                            | 28.7 $\pm$ 0.3                 | 38.3 $\pm$ 0.7                  | 6.7 $\pm$ 0.8              | 80                          |
| BARI Sharisha-14(AA)                     | 30.0 $\pm$ 0.0                            | 34.0 $\pm$ 1.0                 | 39.0 $\pm$ 1.0                  | 5.3 $\pm$ 0.2              | 82                          |
| CrGc3-1(CC)                              | 37.3 $\pm$ 0.9                            | 40.0 $\pm$ 1.6                 | 59.0 $\pm$ 4.2                  | 6.4 $\pm$ 0.8              | 137                         |
| <i>B. alboglabra</i> (CC)                | 79.5 $\pm$ 0.5                            | -                              | 81.0 <sup>c</sup>               | 13.5 $\pm$ 3.9             | 143                         |
| BARI Sharisha -7(AACC)                   | 30.3 $\pm$ 0.3                            | 38.0 $\pm$ 1.0                 | 48.0 $\pm$ 0.0                  | 9.0 $\pm$ 1.0              | 95                          |
| BARI Sharisha -8(AACC)                   | 33.7 $\pm$ 0.7                            | 39.7 $\pm$ 0.3                 | 46.3 $\pm$ 0.3                  | 8.9 $\pm$ 0.4              | 99                          |
| CrGc5-1(AACC)                            | 56.0 $\pm$ 2.0                            | 61.5 $\pm$ 0.4                 | 75.0 $\pm$ 0.8                  | 17.0 $\pm$ 3.4             | 118                         |
| Kirariboshi(AACC)                        | 125.3 $\pm$ 0.7                           | 130.7 $\pm$ 0.8                | 138.3 $\pm$ 2.7                 | 0.6 $\pm$ 0.2              | 159                         |
| LSD (0.05) <sup>b</sup>                  | 4.7                                       | 4.9                            | 8.1                             | 15.4                       |                             |

<sup>a</sup> TCr (Tori-7 $\times$ CrGC3-1), CrT-14 (CrGC3-1 $\times$ Tori-7), AlBA (*B. alboglabra* $\times$ BARIS-14), BARIS (BARI sarisha). <sup>b</sup> LSD (0.05); least significant difference at P=0.05.

<sup>c</sup> Single replication data were available.

**Supplemental Table 2.** Different morphological characteristics of RS F<sub>3</sub> and SRS F<sub>2</sub> *B. napus* along with their parents grown in the short-day climate of Bangladesh (Mean and  $\pm$ SE)

|                                          | Leaf length (cm)   | Leaf width (cm)   | Petal length (mm)  | Petal width (mm)  | Primary branch   | Secondary branch  | Pod length (cm)  |
|------------------------------------------|--------------------|-------------------|--------------------|-------------------|------------------|-------------------|------------------|
| <b>RS <i>B. napus</i> F<sub>3</sub></b>  |                    |                   |                    |                   |                  |                   |                  |
| TCr-2 <sup>a</sup>                       | 25.5<br>$\pm$ 1.2  | 12.6<br>$\pm$ 0.5 | 14.9<br>$\pm$ 0.24 | 10.7<br>$\pm$ 0.2 | 5.3<br>$\pm$ 0.3 | 8.8<br>$\pm$ 1.1  | 4.4<br>$\pm$ 0.1 |
| TCr-3                                    | 20.5<br>$\pm$ 0.7  | 11.2<br>$\pm$ 0.5 | 19.7<br>$\pm$ 0.3  | 11.7<br>$\pm$ 0.1 | 5.9<br>$\pm$ 0.4 | 9.1<br>$\pm$ 0.8  | 4.8<br>$\pm$ 0.1 |
| TCr-4                                    | 18.7<br>$\pm$ 0.9  | 11.8<br>$\pm$ 0.6 | 16.3<br>$\pm$ 0.3  | 9.5<br>$\pm$ 0.2  | 4.8<br>$\pm$ 0.3 | 7.5<br>$\pm$ 1.0  | 5.5<br>$\pm$ 0.1 |
| CrT-14                                   | 21.7<br>$\pm$ 1.0  | 11.3<br>$\pm$ 0.5 | 18.7<br>$\pm$ 0.3  | 12.1<br>$\pm$ 0.2 | 7.8<br>$\pm$ 1.0 | 16.0<br>$\pm$ 1.0 | 4.1<br>$\pm$ 0.6 |
| AlBA-16                                  | 22.5<br>$\pm$ 0.9  | 11.0<br>$\pm$ 0.7 | 16.7<br>$\pm$ 0.3  | 9.9<br>$\pm$ 0.2  | 6.3<br>$\pm$ 0.7 | 11.3<br>$\pm$ 2.4 | 7.1<br>$\pm$ 0.3 |
| <b>SRS <i>B. napus</i> F<sub>2</sub></b> |                    |                   |                    |                   |                  |                   |                  |
| BARI Sarisha-7 $\times$ TCr-4            | 23.7<br>$\pm$ 1.6  | 11.4<br>$\pm$ 0.8 | 14.5<br>$\pm$ 0.3  | 9.5<br>$\pm$ 0.2  | 4.9<br>$\pm$ 0.2 | 6.4<br>$\pm$ 0.6  | 6.4<br>$\pm$ 0.1 |
| BARI Sarisha-8 $\times$ TCr-4            | 28.1<br>$\pm$ 1.6  | 12.9<br>$\pm$ 0.8 | 16.0<br>$\pm$ 0.3  | 9.6<br>$\pm$ 0.2  | 4.9<br>$\pm$ 0.5 | 10.3<br>$\pm$ 1.6 | 7.4<br>$\pm$ 0.4 |
| CrGc5-1 $\times$ TCr-3                   | 27.03<br>$\pm$ 1.3 | 13.5<br>$\pm$ 0.6 | 14.9<br>$\pm$ 0.2  | 8.0<br>$\pm$ 0.2  | 6.5<br>$\pm$ 0.5 | 12.2<br>$\pm$ 1.7 | 4.5<br>$\pm$ 0.2 |
| CrGc5-1 $\times$ TCr-4                   | 28.54<br>$\pm$ 1.4 | 14.7<br>$\pm$ 0.6 | 14.8<br>$\pm$ 0.3  | 8.1<br>$\pm$ 0.2  | 7.3<br>$\pm$ 0.5 | 15.0<br>$\pm$ 1.8 | 4.7<br>$\pm$ 0.2 |
| Kirariboshi $\times$ TCr-2               | 38.45<br>$\pm$ 1.7 | 16.6<br>$\pm$ 0.8 | 14.9<br>$\pm$ 0.3  | 9.3<br>$\pm$ 0.4  | 7.8<br>$\pm$ 0.3 | 14.3<br>$\pm$ 1.2 | 4.2<br>$\pm$ 0.1 |
| Kirariboshi $\times$ TCr-4               | 30.17<br>$\pm$ 1.1 | 15.3<br>$\pm$ 0.6 | 15.2<br>$\pm$ 0.2  | 9.3<br>$\pm$ 0.1  | 7.5<br>$\pm$ 0.6 | 10.7<br>$\pm$ 1.2 | 5.1<br>$\pm$ 0.2 |
| <b>Parental species</b>                  |                    |                   |                    |                   |                  |                   |                  |
| Tori-7(AA)                               | 12.8<br>$\pm$ 0.7  | 5.4<br>$\pm$ 0.3  | 10.1<br>$\pm$ 0.2  | 6.1<br>$\pm$ 0.2  | 6.1<br>$\pm$ 0.3 | 6.4<br>$\pm$ 0.7  | 4.3<br>$\pm$ 0.0 |
| BARI Sharisha-14 (AA)                    | 9.7 a<br>$\pm$ 0.2 | 3.6<br>$\pm$ 0.0  | 10.2<br>$\pm$ 0.2  | 5.0<br>$\pm$ 0.0  | 5.2<br>$\pm$ 0.2 | 3.8<br>$\pm$ 0.5  | 4.1<br>$\pm$ 0.0 |
| CrGc3-1(CC)                              | 14.9<br>$\pm$ 0.4  | 7.2<br>$\pm$ 0.3  | 17.9<br>$\pm$ 0.4  | 8.1<br>$\pm$ 0.2  | 4.6<br>$\pm$ 0.3 | 5.6<br>$\pm$ 0.6  | 4.0<br>$\pm$ 0.2 |
| <i>B. alboglabra</i> (CC)                | 24.2<br>$\pm$ 1.2  | 11.5<br>$\pm$ 0.9 | 18.9<br>$\pm$ 0.2  | 10.7<br>$\pm$ 0.2 | 5.5<br>$\pm$ 0.6 | 5.8<br>$\pm$ 2.8  | 5.8<br>$\pm$ 0.3 |
| BARI Sarisha-7 (AACC)                    | 22.0<br>$\pm$ 1.2  | 8.6<br>$\pm$ 0.5  | 13.9<br>$\pm$ 0.2  | 8.9<br>$\pm$ 0.2  | 3.3<br>$\pm$ 0.2 | 3.1<br>$\pm$ 0.2  | 6.7<br>$\pm$ 0.1 |
| BARI Sarisha-8 (AACC)                    | 23.1<br>$\pm$ 1.0  | 8.2<br>$\pm$ 0.3  | 14.4<br>$\pm$ 0.3  | 8.8<br>$\pm$ 0.2  | 3.0<br>$\pm$ 0.2 | 2.6<br>$\pm$ 0.1  | 7.5<br>$\pm$ 0.1 |
| CrGc5-1 (AACC)                           | 27.79<br>$\pm$ 1.2 | 11.4<br>$\pm$ 0.5 | 11.9<br>$\pm$ 0.4  | 7.9<br>$\pm$ 0.4  | 8.9<br>$\pm$ 0.4 | 10.6<br>$\pm$ 1.5 | 5.5<br>$\pm$ 0.1 |
| Kirariboshi (AACC)                       | 35.64<br>$\pm$ 0.9 | 13.3<br>$\pm$ 0.5 | 14.0<br>$\pm$ 0.0  | 9.0<br>$\pm$ 0.0  | 6.4<br>$\pm$ 0.7 | 12.4<br>$\pm$ 1.4 | 3.0<br>$\pm$ 0.2 |
| LSD(0.05) <sup>b</sup>                   | 4.6                | 2.8               | 0.9                | 0.9               | 1.9              | 6.9               | 0.7              |

<sup>a</sup> TCr (Tori-7 $\times$ CrGC3-1), CrT-14 (CrGC3-1 $\times$ Tori-7), AIBA (*B. alboglabra* $\times$ BARIS-14), BARIS (BARI sarisha). <sup>b</sup> LSD (0.05); least significant difference at P=0.05.

**Supplemental Table 3** Characteristics of RS F<sub>3</sub>, SRS F<sub>2</sub> *B. napus* and their parents when grown in the short-day climate of Bangladesh

|                                          | Palmitic<br>C <sub>16:0</sub> | Stearic<br>C <sub>18:0</sub> | Oleic<br>C <sub>18:1</sub> | Linoleic<br>C <sub>18:2</sub> | Lenolenic<br>C <sub>18:3</sub> | Eurosenoic |
|------------------------------------------|-------------------------------|------------------------------|----------------------------|-------------------------------|--------------------------------|------------|
| <b>RS <i>B. napus</i> F<sub>3</sub></b>  |                               |                              |                            |                               |                                |            |
| TCr-2                                    | 2.6                           | 1.1                          | 24.6                       | 13.7                          | 6.1                            | 11.6       |
| TCr-3                                    | 2.8                           | 0.9                          | 23.6                       | 14.4                          | 4.6                            | 10.1       |
| TCr-4                                    | 3.1                           | 0.8                          | 18.2                       | 15.0                          | 6.1                            | 9.1        |
| CrT-14                                   | 3.4                           | 0.6                          | 22.3                       | 14.4                          | 6.01                           | 11.4       |
| AlBA-16                                  | 2.4                           | 0.9                          | 31.1                       | 6.6                           | 8.9                            | 7.5        |
| <b>SRS <i>B. napus</i> F<sub>2</sub></b> |                               |                              |                            |                               |                                |            |
| BARI Sarisha -7×TCr-4                    | 2.8                           | -                            | 19.3                       | 12.5                          | 7.6                            | 8.9        |
| BARI Sarisha-8×TCr-4                     | 2.6                           | 1.0                          | 15.2                       | 14.4                          | 7.7                            | 7.9        |
| CrGc5-1×TCr-3                            | 3.2                           | 0.5                          | 30.6                       | 14.4                          | 5.3                            | 12.2       |
| Kirariboshi ×TCr-4                       | 3.9                           | 0.6                          | 36.4                       | 16.3                          | 4.5                            | 11.6       |
| <b>Parental species</b>                  |                               |                              |                            |                               |                                |            |
| Tori-7(AA)                               | 1.2                           | 1.0                          | 10.5                       | 13.7                          | 6.8                            | 7.8        |
| BARI Sarisha-14(AA)                      | 1.7                           | 1.1                          | 11.8                       | 12.0                          | 7.6                            | -          |
| CrGc3-1(CC)                              | 3.0                           | 0.7                          | 19.5                       | 10.0                          | 6.4                            | 7.1        |
| <i>B. alboglabra</i> (CC)                | 3.1                           | -                            | 18.0                       | 10.3                          | 7.5                            | 6.6        |
| BARI Sarisha -7(AACC)                    | 3.4                           | -                            | 20.0                       | 15.5                          | 9.3                            | 11.0       |
| BARI Sarisha -8(AACC)                    | 2.3                           | 0.6                          | 14.2                       | 13.5                          | 8.3                            | 9.0        |
| CrGc5-1(AACC)                            | 3.28                          | 1.4                          | 40.3                       | 12.3                          | 3.6                            | 3.8        |
